# Supplementary material for: Therapist-Supported Internet-Based Cognitive Behavior Therapy for Stress, Anxiety, and Depressive Symptoms Among Postpartum Women: A Systematic Review and Meta-Analysis
Source: PubMed Central journal article supplement (PMC5429436; doi:10.2196/jmir.6712), 2017-04-28
Supplement: jmir_v19i4e138_app2.pdf [file jmir_v19i4e138_app2.pdf]

**Multimedia Appendix 2.** Risk of bias graph.

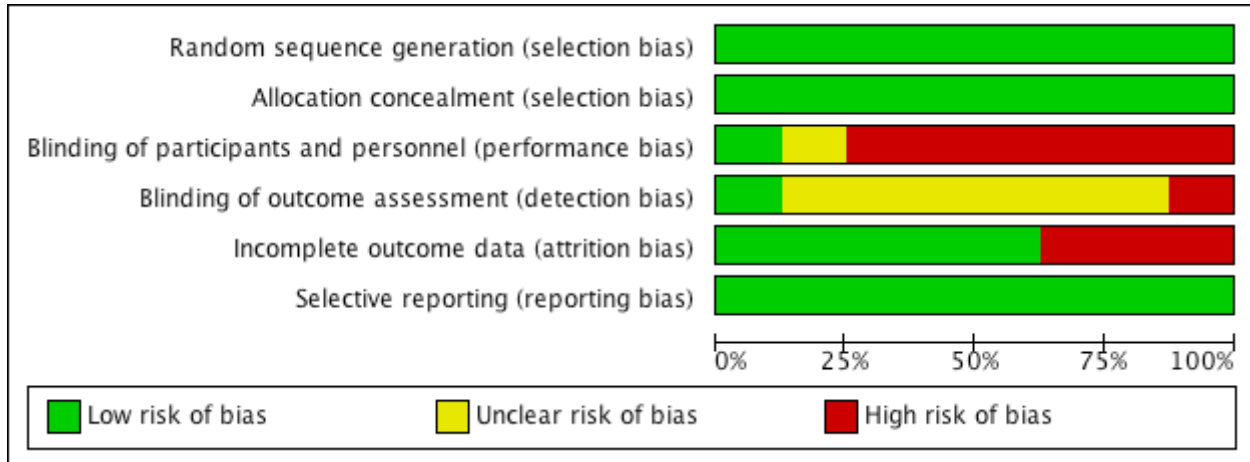

Note: review authors' judgements about each risk of bias item presented as percentages across all included studies.
