# Supplementary material for: Therapist-Supported Internet-Based Cognitive Behavior Therapy for Stress, Anxiety, and Depressive Symptoms Among Postpartum Women: A Systematic Review and Meta-Analysis
Source: PubMed Central journal article supplement (PMC5429436; doi:10.2196/jmir.6712), 2017-04-28
Supplement: jmir_v19i4e138_app3.pdf [file jmir_v19i4e138_app3.pdf]

### Multimedia Appendix 3. Description of Internet-based cognitive behavioral therapy in 8 trials

| Author (year)         | Ref  | Aim       | No  | Components of iCBT Intervention                                                                                                                 | Therapy    | Support                                | Duration |
|-----------------------|------|-----------|-----|-------------------------------------------------------------------------------------------------------------------------------------------------|------------|----------------------------------------|----------|
| Kersting et al (2011) | [47] | Treatment | 6S  | 3 phases: self-confrontation, cognitive restructuring and social sharing                                                                        | One-to-one | Therapist-assisted                     | 5W       |
| Kersting et al (2013) | [46] | Treatment | 6S  | 3 phases: self-confrontation, cognitive reappraisal and social sharing                                                                          | One-to-one | Therapist-assisted                     | 5W       |
| Milgrom et al (2016)  | [28] | Treatment | 6S  | Getting start, managing mood, increasing pleasant activities and positive though, managing negative thoughts and planning for future.           | One-to-one | Therapist-assisted and self-monitoring | 6W       |
| Nieminen et al (2016) | [29] | Treatment | 8S  | Psychoeducation, anxiety coping, method, skill training, imaginary, vivo exposure and cognitive restructuring                                   | One-to-one | Therapist-assisted                     | 8 W      |
| O'Mahen et al (2013)  | [32] | Treatment | 11S | Behavioural activation including functional analysis, alternative, problem solving, ruminations strategies and relapse prevention               | One-to-one | Therapist-assisted and self-monitoring | 15W      |
| O'Mahen et al (2014)  | [30] | Treatment | 12S | Behavioural activation including functional analysis, alternative, problem solving, ruminations strategies and relapse prevention               | One-to-one | Therapist-assisted                     | 17W      |
| Pugh et al (2016)     | [31] | Treatment | 7S  | Psychoeducation, activity planning, relaxation, thinking style, cognitive restructuring, problem solving and relapse prevention                 | One-to-one | Therapist-assisted                     | 10W      |
| Sheeber et al. (2012) | [33] | Treatment | 8S  | Behavioural activation, interpersonal skills, cognitive skill, managing positive and negative thoughts, planning for future and parenting focus | One-to-one | Therapist-assisted and self-monitoring | 14W      |

Aim, Aim of intervention; iCBT, Internet-based Cognitive Behavioural Therapy; No, Number of session; S, Sessions; W, Week.
