# Supplementary material for: Therapist-Supported Internet-Based Cognitive Behavior Therapy for Stress, Anxiety, and Depressive Symptoms Among Postpartum Women: A Systematic Review and Meta-Analysis
Source: PubMed Central journal article supplement (PMC5429436; doi:10.2196/jmir.6712), 2017-04-28
Supplement: jmir_v19i4e138_app4.pdf [file jmir_v19i4e138_app4.pdf]

**Multimedia Appendix 4.** Interaction of Internet-based cognitive behavioral therapy in 8 trials.

| Author (year)         | Ref  | Provider (Detail)                                                  | Peer     | Partner                     | Contact                                   | Communication /Interactivity                                 | Activities/ Multimedia                                                    |
|-----------------------|------|--------------------------------------------------------------------|----------|-----------------------------|-------------------------------------------|--------------------------------------------------------------|---------------------------------------------------------------------------|
| Kersting et al (2011) | [47] | CBT trained internet therapist (Psychologists)                     | No       | No                          | Website                                   | Asynchronous two-way supportive feedback                     | Text-based Assignment Expressive writing                                  |
| Kersting et al (2013) | [46] | CBT trained internet therapist (Psychologists)                     | No       | No                          | Website                                   | Asynchronous two-way supportive feedback                     | Text-based Assignment Letter writing                                      |
| Milgrom et al (2016)  | [28] | Therapist (Psychology, Clinical psychologist, Health psychologist) | Yes Chat | Yes Partner support website | Phone guided Website reminder or tracking | Synchronous two-way supportive feedback (Telephone coaching) | Text-based Animation Case vignettes Video, audio tutorial Photos Workbook |
| Nieminen et al (2016) | [29] | Therapist (Psychologist and MSc psychology students)               | No       | No                          | Website Contact system (request)          | Asynchronous two-way supportive feedback                     | Text-based Therapy track Assignment track                                 |
| O'Mahen et al (2013)  | [32] | Therapists (Specialist health visitor and clinical psychologist)   | Yes Chat | No                          | Website Phone E-mail                      | Asynchronous two-way supportive feedback                     | Multimedia Online clinic Assignment                                       |
| O'Mahen et al (2014)  | [30] | Therapist (Mental health workers)                                  | Yes Chat | No                          | Website E-mail Phone Text messages        | Asynchronous two-way supportive feedback                     | Interactive exercise with work examples Audio                             |
| Pugh et al (2016)     | [31] | Therapist (PhD clinical psychology students and psychologist)      | No       | No                          | Email Phone                               | Asynchronous two-way supportive feedback                     | Assignment Text /Animation Video / Audio Check-in questions               |
| Sheeber et al. (2012) | [33] | CBT trained therapist (Mental health worker and lay person)        | Yes Chat | No                          | Website Phone                             | Asynchronous two-way supportive feedback                     | Board writing Bulletin board Online consultation                          |

Chat, Chat Room Discussion; Contact, Contact with therapist; Partner, Partner Support; Peer, Peer Support
